# Supplementary material
Source: publisher figshare collection journal article supplement (https://acs.figshare.com/ndownloader/files/4659766)
Supplement: Supplementary file 1 [file 4659766]

#==============================================================================

data_CuL3NO_1_

#==============================================================================

# CHEMICAL DATA

_chemical_formula_sum                  'C31 H54 B Cl2 Cu N7 O '
_chemical_formula_moiety               'C31 H54 B Cl2 Cu N7 O '
_chemical_formula_weight               686.08
_chemical_melting_point                ?

#==============================================================================

# CRYSTAL DATA
_symmetry_cell_setting                 triclinic
_symmetry_space_group_name_H-M        'P -1'
_symmetry_space_group_name_Hall       '-P 1'
_symmetry_Int_Tables_number            2
loop_
_symmetry_equiv_pos_site_id
_symmetry_equiv_pos_as_xyz
1   '+X,+Y,+Z'
2   '-X,-Y,-Z'

#------------------------------------------------------------------------------

_cell_length_a                         9.6066(2)
_cell_length_b                         10.5689(2)
_cell_length_c                         19.4575(2)
_cell_angle_alpha                      77.6840(4)
_cell_angle_beta                       87.7760(4)
_cell_angle_gamma                      72.6690(4)
_cell_volume                           1841.80(6)
_cell_formula_units_Z                  2
_cell_measurement_reflns_used          376
_cell_measurement_theta_min            3.0
_cell_measurement_theta_max            27.5
_cell_measurement_temperature          193.1

#------------------------------------------------------------------------------

_exptl_crystal_description            'platelet'
_exptl_crystal_colour                 'red'
_exptl_crystal_size_max                0.45
_exptl_crystal_size_mid                0.20
_exptl_crystal_size_min                0.10
_exptl_crystal_density_diffrn          1.237
_exptl_crystal_density_meas            ?
_exptl_crystal_density_method         'not measured'
_exptl_crystal_F_000                   730.00
_exptl_absorpt_coefficient_mu          0.771
_exptl_absorpt_correction_type         multi-scan
_exptl_absorpt_process_details         
'Jacobson, R. (1998) Private communication'
_exptl_absorpt_correction_T_min        0.715
_exptl_absorpt_correction_T_max        0.926

#==============================================================================

# EXPERIMENTAL DATA

_diffrn_radiation_type                'Mo K\a'
_diffrn_radiation_wavelength           0.71070
_diffrn_measurement_device_type       'Rigaku Mercury'
_diffrn_measurement_method             \w
_diffrn_detector_area_resol_mean       7.32
_diffrn_reflns_number                  14892
_diffrn_reflns_av_R_equivalents        0.038
_diffrn_reflns_theta_max               27.48
_diffrn_measured_fraction_theta_max    0.979
_diffrn_reflns_theta_full              27.48
_diffrn_measured_fraction_theta_full   0.979
_diffrn_reflns_limit_h_min             -9
_diffrn_reflns_limit_h_max             12
_diffrn_reflns_limit_k_min             -13
_diffrn_reflns_limit_k_max             13
_diffrn_reflns_limit_l_min             -22
_diffrn_reflns_limit_l_max             25

#==============================================================================

# REFINEMENT DATA

_refine_special_details
;
    Refinement was performed using reflections with F^2^ > 3.0 sigma(F^2^).
    The weighted R-factor(wR), goodness of fit (S) and R-factor (gt) are 
    based on F, with F set to zero for negative F. The threshold expression of
    F^2^ > 2.0 sigma(F^2^) is used only for calculating R-factor (gt).
;
_reflns_number_total                   8278
_reflns_number_gt                      6961
_reflns_threshold_expression           F^2^>2.0\s(F^2^)
_refine_ls_structure_factor_coef       F
_refine_ls_R_factor_gt                 0.0825
_refine_ls_wR_factor_ref               0.1077
_refine_ls_hydrogen_treatment          refall
_refine_ls_number_reflns               6961
_refine_ls_number_parameters           442
_refine_ls_goodness_of_fit_ref         1.829
_refine_ls_weighting_scheme            calc
_refine_ls_weighting_details
'w = 1/[0.0010Fo^2^ + 3.0000\s(Fo^2^) + 0.5000]'
_refine_ls_shift/su_max                0.0000
_refine_diff_density_max               0.88
_refine_diff_density_min               -0.91
_refine_ls_extinction_method           none
_refine_ls_extinction_coef             ?

loop_
_atom_type_symbol
_atom_type_description
_atom_type_scat_dispersion_real
_atom_type_scat_dispersion_imag
_atom_type_scat_source
  'C' 'C'  0.003 0.002 
;
International Tables for Crystallography
(1992, Vol. C, Tables 4.2.6.8 and 6.1.1.4)
;
  'H' 'H'  0.000 0.000 
;
International Tables for Crystallography
(1992, Vol. C, Table 6.1.1.4)
;
  'B' 'B'  0.001 0.001 
;
International Tables for Crystallography
(1992, Vol. C, Tables 4.2.6.8 and 6.1.1.4)
;
  'Cl' 'Cl'  0.148 0.159 
;
International Tables for Crystallography
(1992, Vol. C, Tables 4.2.6.8 and 6.1.1.4)
;
  'Cu' 'Cu'  0.320 1.265 
;
International Tables for Crystallography
(1992, Vol. C, Tables 4.2.6.8 and 6.1.1.4)
;
  'N' 'N'  0.006 0.003 
;
International Tables for Crystallography
(1992, Vol. C, Tables 4.2.6.8 and 6.1.1.4)
;
  'O' 'O'  0.011 0.006 
;
International Tables for Crystallography
(1992, Vol. C, Tables 4.2.6.8 and 6.1.1.4)
;

#==============================================================================

# ATOMIC COORDINATES AND THERMAL PARAMETERS

loop_
_atom_site_label
_atom_site_type_symbol
_atom_site_fract_x
_atom_site_fract_y
_atom_site_fract_z
_atom_site_U_iso_or_equiv
_atom_site_adp_type
_atom_site_occupancy
_atom_site_symmetry_multiplicity
_atom_site_calc_flag
_atom_site_refinement_flags
_atom_site_disorder_assembly
_atom_site_disorder_group
 Cu1 Cu 0.05916(5) 0.01295(5) 0.27369(3) 0.02701(15) Uani 1.00 1 d . . .
 Cl51 Cl -0.3066(3) 0.2616(2) 0.04158(12) 0.1084(9) Uani 1.00 1 d . . .
 Cl52 Cl -0.3284(2) 0.5229(2) 0.07092(11) 0.0832(7) Uani 1.00 1 d . . .
 O41 O 0.0811(7) -0.2603(4) 0.2685(3) 0.110(2) Uani 1.00 1 d . . .
 N11 N -0.1407(3) 0.1524(3) 0.27761(18) 0.0211(8) Uani 1.00 1 d . . .
 N12 N -0.1278(3) 0.2767(3) 0.28070(18) 0.0199(8) Uani 1.00 1 d . . .
 N21 N 0.1266(3) 0.1468(3) 0.19606(19) 0.0230(8) Uani 1.00 1 d . . .
 N22 N 0.1031(3) 0.2714(3) 0.21376(18) 0.0219(8) Uani 1.00 1 d . . .
 N31 N 0.1413(3) 0.0636(3) 0.35623(18) 0.0212(8) Uani 1.00 1 d . . .
 N32 N 0.1149(3) 0.2016(3) 0.34706(18) 0.0202(8) Uani 1.00 1 d . . .
 N41 N 0.0826(4) -0.1584(4) 0.2689(2) 0.0411(12) Uani 1.00 1 d . . .
 C10 C -0.2912(5) -0.0088(5) 0.2067(2) 0.0403(14) Uani 1.00 1 d . . .
 C11 C -0.2867(5) -0.0639(4) 0.3394(2) 0.0388(13) Uani 1.00 1 d . . .
 C12 C -0.5098(4) 0.0937(5) 0.2718(2) 0.0407(14) Uani 1.00 1 d . . .
 C13 C -0.3408(4) 0.0468(4) 0.2730(2) 0.0251(10) Uani 1.00 1 d . . .
 C14 C -0.2847(3) 0.1671(4) 0.2754(2) 0.0235(10) Uani 1.00 1 d . . .
 C15 C -0.3633(3) 0.2991(4) 0.2762(2) 0.0243(10) Uani 1.00 1 d . . .
 C16 C -0.2628(3) 0.3687(4) 0.2799(2) 0.0210(9) Uani 1.00 1 d . . .
 C17 C -0.2861(4) 0.5127(4) 0.2854(2) 0.0248(10) Uani 1.00 1 d . . .
 C18 C -0.4338(4) 0.6051(4) 0.2543(2) 0.0400(13) Uani 1.00 1 d . . .
 C19 C -0.2714(5) 0.5197(5) 0.3623(2) 0.0364(13) Uani 1.00 1 d . . .
 C20 C 0.0935(5) -0.0081(6) 0.0862(3) 0.0468(16) Uani 1.00 1 d . . .
 C21 C 0.3467(5) -0.0801(5) 0.1361(3) 0.0451(15) Uani 1.00 1 d . . .
 C22 C 0.2831(6) 0.0828(6) 0.0218(3) 0.0557(18) Uani 1.00 1 d . . .
 C23 C 0.2266(4) 0.0392(4) 0.0947(2) 0.0317(12) Uani 1.00 1 d . . .
 C24 C 0.1854(4) 0.1565(4) 0.1323(2) 0.0276(11) Uani 1.00 1 d . . .
 C25 C 0.2004(4) 0.2855(4) 0.1089(2) 0.0327(12) Uani 1.00 1 d . . .
 C26 C 0.1480(4) 0.3559(4) 0.1608(2) 0.0279(11) Uani 1.00 1 d . . .
 C27 C 0.1392(4) 0.5000(4) 0.1625(2) 0.0328(12) Uani 1.00 1 d . . .
 C28 C 0.0167(6) 0.6005(6) 0.1136(4) 0.069(2) Uani 1.00 1 d . . .
 C29 C 0.2849(5) 0.5265(5) 0.1411(3) 0.0493(16) Uani 1.00 1 d . . .
 C30 C 0.3656(4) -0.2204(5) 0.3979(3) 0.0402(14) Uani 1.00 1 d . . .
 C31 C 0.1236(4) -0.1941(5) 0.4566(2) 0.0395(14) Uani 1.00 1 d . . .
 C32 C 0.3352(6) -0.1756(5) 0.5198(3) 0.0520(16) Uani 1.00 1 d . . .
 C33 C 0.2601(4) -0.1452(4) 0.4472(2) 0.0268(11) Uani 1.00 1 d . . .
 C34 C 0.2146(3) 0.0066(4) 0.4171(2) 0.0222(10) Uani 1.00 1 d . . .
 C35 C 0.2373(3) 0.1075(4) 0.4483(2) 0.0227(10) Uani 1.00 1 d . . .
 C36 C 0.1720(3) 0.2289(4) 0.4030(2) 0.0208(9) Uani 1.00 1 d . . .
 C37 C 0.1667(4) 0.3702(4) 0.4097(2) 0.0251(10) Uani 1.00 1 d . . .
 C38 C 0.1856(5) 0.3737(5) 0.4871(2) 0.0372(13) Uani 1.00 1 d . . .
 C39 C 0.2826(4) 0.4198(4) 0.3656(2) 0.0357(13) Uani 1.00 1 d . . .
 C51 C -0.2281(8) 0.3487(7) 0.0907(3) 0.079(2) Uani 1.00 1 d . . .
 B1 B 0.0255(4) 0.2979(4) 0.2823(2) 0.0202(10) Uani 1.00 1 d . . .
 H1 H -0.3630 -0.0430 0.1915 0.053 Uiso 1.00 1 c R . .
 H2 H -0.2788 0.0636 0.1710 0.053 Uiso 1.00 1 c R . .
 H3 H -0.2013 -0.0791 0.2157 0.053 Uiso 1.00 1 c R . .
 H4 H -0.1941 -0.0631 0.3545 0.048 Uiso 1.00 1 c R . .
 H5 H -0.3551 -0.0466 0.3754 0.048 Uiso 1.00 1 c R . .
 H6 H -0.2789 -0.1502 0.3298 0.048 Uiso 1.00 1 c R . .
 H7 H -0.5464 0.0208 0.2932 0.052 Uiso 1.00 1 c R . .
 H8 H -0.5420 0.1648 0.2968 0.052 Uiso 1.00 1 c R . .
 H9 H -0.5446 0.1262 0.2244 0.052 Uiso 1.00 1 c R . .
 H10 H -0.4666 0.3354 0.2746 0.029 Uiso 1.00 1 c R . .
 H11 H -0.2117 0.5433 0.2600 0.029 Uiso 1.00 1 c R . .
 H12 H -0.5051 0.6084 0.2896 0.046 Uiso 1.00 1 c R . .
 H13 H -0.4268 0.6939 0.2362 0.046 Uiso 1.00 1 c R . .
 H14 H -0.4611 0.5706 0.2173 0.046 Uiso 1.00 1 c R . .
 H15 H -0.1727 0.5091 0.3735 0.043 Uiso 1.00 1 c R . .
 H16 H -0.3310 0.6053 0.3693 0.043 Uiso 1.00 1 c R . .
 H17 H -0.3021 0.4496 0.3918 0.043 Uiso 1.00 1 c R . .
 H18 H 0.0319 0.0041 0.1252 0.059 Uiso 1.00 1 c R . .
 H19 H 0.0409 0.0428 0.0440 0.059 Uiso 1.00 1 c R . .
 H20 H 0.1257 -0.1015 0.0845 0.059 Uiso 1.00 1 c R . .
 H21 H 0.4058 -0.1274 0.1038 0.053 Uiso 1.00 1 c R . .
 H22 H 0.4051 -0.0482 0.1625 0.053 Uiso 1.00 1 c R . .
 H23 H 0.3037 -0.1396 0.1671 0.053 Uiso 1.00 1 c R . .
 H24 H 0.2359 0.1763 0.0039 0.067 Uiso 1.00 1 c R . .
 H25 H 0.3853 0.0681 0.0253 0.067 Uiso 1.00 1 c R . .
 H26 H 0.2638 0.0311 -0.0090 0.067 Uiso 1.00 1 c R . .
 H27 H 0.2400 0.3184 0.0657 0.040 Uiso 1.00 1 c R . .
 H28 H 0.1205 0.5124 0.2093 0.040 Uiso 1.00 1 c R . .
 H29 H -0.0715 0.6185 0.1386 0.080 Uiso 1.00 1 c R . .
 H30 H 0.0395 0.6829 0.0962 0.080 Uiso 1.00 1 c R . .
 H31 H 0.0053 0.5613 0.0753 0.080 Uiso 1.00 1 c R . .
 H32 H 0.2807 0.5611 0.0917 0.062 Uiso 1.00 1 c R . .
 H33 H 0.3010 0.5910 0.1647 0.062 Uiso 1.00 1 c R . .
 H34 H 0.3625 0.4445 0.1525 0.062 Uiso 1.00 1 c R . .
 H35 H 0.3436 -0.1724 0.3505 0.047 Uiso 1.00 1 c R . .
 H36 H 0.4633 -0.2282 0.4097 0.047 Uiso 1.00 1 c R . .
 H37 H 0.3547 -0.3083 0.4030 0.047 Uiso 1.00 1 c R . .
 H38 H 0.1390 -0.2680 0.4960 0.048 Uiso 1.00 1 c R . .
 H39 H 0.0425 -0.1218 0.4647 0.048 Uiso 1.00 1 c R . .
 H40 H 0.1048 -0.2225 0.4157 0.048 Uiso 1.00 1 c R . .
 H41 H 0.3869 -0.1124 0.5216 0.061 Uiso 1.00 1 c R . .
 H42 H 0.2633 -0.1702 0.5548 0.061 Uiso 1.00 1 c R . .
 H43 H 0.4013 -0.2647 0.5281 0.061 Uiso 1.00 1 c R . .
 H44 H 0.2875 0.0947 0.4915 0.027 Uiso 1.00 1 c R . .
 H45 H 0.0738 0.4299 0.3926 0.031 Uiso 1.00 1 c R . .
 H46 H 0.2862 0.3544 0.4982 0.047 Uiso 1.00 1 c R . .
 H47 H 0.1342 0.4613 0.4947 0.047 Uiso 1.00 1 c R . .
 H48 H 0.1480 0.3079 0.5164 0.047 Uiso 1.00 1 c R . .
 H49 H 0.2447 0.4640 0.3195 0.045 Uiso 1.00 1 c R . .
 H50 H 0.3118 0.4811 0.3869 0.045 Uiso 1.00 1 c R . .
 H51 H 0.3645 0.3438 0.3632 0.045 Uiso 1.00 1 c R . .
 H52 H 0.0142 0.3890 0.2853 0.024 Uiso 1.00 1 c R . .
 H53 H -0.1296 0.3382 0.0777 0.089 Uiso 1.00 1 c R . .
 H54 H -0.2313 0.3127 0.1397 0.090 Uiso 1.00 1 c R . .


loop_
_atom_site_aniso_label
_atom_site_aniso_U_11
_atom_site_aniso_U_22
_atom_site_aniso_U_33
_atom_site_aniso_U_12
_atom_site_aniso_U_13
_atom_site_aniso_U_23
 Cu1 0.0277(2) 0.0176(3) 0.0372(3) -0.0063(2) -0.0046(2) -0.0083(2)
 Cl51 0.187(2) 0.0698(15) 0.0660(14) -0.0399(16) -0.0097(14) -0.0052(11)
 Cl52 0.0979(13) 0.0853(15) 0.0750(13) -0.0383(11) 0.0155(10) -0.0217(11)
 O41 0.168(5) 0.026(2) 0.136(5) -0.017(3) -0.035(4) -0.028(3)
 N11 0.0150(13) 0.0171(17) 0.032(2) -0.0048(12) -0.0037(12) -0.0065(14)
 N12 0.0164(13) 0.0151(17) 0.0278(19) -0.0044(12) -0.0023(12) -0.0036(14)
 N21 0.0203(14) 0.0192(18) 0.029(2) -0.0043(13) -0.0040(13) -0.0051(15)
 N22 0.0195(14) 0.0187(17) 0.0275(19) -0.0056(13) -0.0047(12) -0.0042(14)
 N31 0.0170(14) 0.0174(17) 0.0282(19) -0.0029(12) -0.0040(12) -0.0051(14)
 N32 0.0176(14) 0.0120(16) 0.0306(19) -0.0029(12) -0.0028(12) -0.0052(14)
 N41 0.051(2) 0.020(2) 0.054(2) -0.0097(17) -0.0074(19) -0.012(2)
 C10 0.035(2) 0.049(3) 0.047(3) -0.022(2) 0.001(2) -0.018(2)
 C11 0.043(2) 0.031(2) 0.045(3) -0.021(2) -0.006(2) 0.002(2)
 C12 0.027(2) 0.040(2) 0.062(3) -0.018(2) 0.001(2) -0.016(2)
 C13 0.0235(18) 0.023(2) 0.032(2) -0.0125(16) -0.0024(15) -0.0046(18)
 C14 0.0186(16) 0.027(2) 0.026(2) -0.0098(15) -0.0051(14) -0.0021(17)
 C15 0.0153(16) 0.029(2) 0.028(2) -0.0065(15) -0.0018(14) -0.0052(18)
 C16 0.0180(16) 0.019(2) 0.023(2) -0.0029(14) -0.0021(14) -0.0012(16)
 C17 0.0230(18) 0.020(2) 0.030(2) -0.0033(15) -0.0001(15) -0.0053(18)
 C18 0.026(2) 0.028(2) 0.060(3) 0.0007(18) -0.008(2) -0.008(2)
 C19 0.041(2) 0.027(2) 0.038(2) -0.0013(19) -0.003(2) -0.013(2)
 C20 0.038(2) 0.058(3) 0.051(3) -0.009(2) -0.012(2) -0.030(2)
 C21 0.034(2) 0.039(3) 0.060(3) -0.001(2) -0.009(2) -0.017(2)
 C22 0.075(3) 0.049(3) 0.043(3) -0.013(2) 0.019(2) -0.019(2)
 C23 0.033(2) 0.034(2) 0.027(2) -0.0060(19) -0.0017(17) -0.011(2)
 C24 0.0241(18) 0.028(2) 0.029(2) -0.0050(16) -0.0061(16) -0.0055(19)
 C25 0.036(2) 0.036(2) 0.027(2) -0.013(2) 0.0042(17) -0.006(2)
 C26 0.0255(18) 0.031(2) 0.026(2) -0.0108(17) -0.0034(15) 0.0008(19)
 C27 0.041(2) 0.026(2) 0.033(2) -0.0150(19) 0.0042(19) -0.000(2)
 C28 0.052(3) 0.034(3) 0.114(6) -0.012(2) -0.029(3) 0.007(3)
 C29 0.046(2) 0.045(3) 0.064(3) -0.029(2) -0.004(2) -0.002(2)
 C30 0.033(2) 0.027(2) 0.057(3) -0.0042(19) 0.004(2) -0.006(2)
 C31 0.036(2) 0.031(2) 0.052(3) -0.016(2) 0.007(2) -0.000(2)
 C32 0.073(3) 0.031(2) 0.049(3) -0.022(2) -0.030(2) 0.013(2)
 C33 0.0243(18) 0.022(2) 0.031(2) -0.0065(16) -0.0047(16) 0.0008(18)
 C34 0.0154(16) 0.023(2) 0.026(2) -0.0049(14) -0.0002(14) -0.0019(17)
 C35 0.0210(17) 0.024(2) 0.022(2) -0.0061(15) -0.0058(14) -0.0034(17)
 C36 0.0140(15) 0.021(2) 0.029(2) -0.0048(14) -0.0012(14) -0.0087(17)
 C37 0.0196(17) 0.022(2) 0.035(2) -0.0049(15) -0.0037(15) -0.0107(18)
 C38 0.041(2) 0.035(2) 0.041(2) -0.012(2) -0.002(2) -0.018(2)
 C39 0.036(2) 0.032(2) 0.045(3) -0.020(2) -0.004(2) -0.006(2)
 C51 0.108(5) 0.075(5) 0.041(4) -0.007(4) -0.018(3) -0.008(3)
 B1 0.0195(18) 0.013(2) 0.030(2) -0.0063(15) -0.0036(16) -0.0037(18)

#==============================================================================

_computing_data_collection            'CrystalClear'
_computing_cell_refinement            'CrystalClear'
_computing_data_reduction             'CrystalStructure'
_computing_structure_solution         'SIR92'
_computing_structure_refinement       'CRYSTALS'
_computing_publication_material       'CrystalStructure 3.8'
_computing_molecular_graphics          ?

#==============================================================================

# MOLECULAR GEOMETRY

_geom_special_details
;
    ENTER SPECIAL DETAILS OF THE MOLECULAR GEOMETRY
;

loop_
_geom_bond_atom_site_label_1
_geom_bond_atom_site_label_2
_geom_bond_distance
_geom_bond_publ_flag
_geom_bond_site_symmetry_1
_geom_bond_site_symmetry_2
Cu1 N11 2.053(2) yes . .
Cu1 N21 2.064(3) yes . .
Cu1 N31 2.051(3) yes . .
Cu1 N41 1.779(4) yes . .
Cl51 C51 1.781(9) yes . .
Cl52 C51 1.771(7) yes . .
O41 N41 1.083(7) yes . .
N11 N12 1.370(5) yes . .
N11 C14 1.347(4) yes . .
N12 C16 1.368(4) yes . .
N12 B1 1.557(5) yes . .
N21 N22 1.384(5) yes . .
N21 C24 1.340(5) yes . .
N22 C26 1.358(5) yes . .
N22 B1 1.540(5) yes . .
N31 N32 1.376(4) yes . .
N31 C34 1.331(4) yes . .
N32 C36 1.358(5) yes . .
N32 B1 1.541(4) yes . .
C10 C13 1.532(7) yes . .
C11 C13 1.534(5) yes . .
C12 C13 1.550(5) yes . .
C13 C14 1.530(6) yes . .
C14 C15 1.378(5) yes . .
C15 C16 1.389(6) yes . .
C16 C17 1.497(6) yes . .
C17 C18 1.523(5) yes . .
C17 C19 1.528(7) yes . .
C20 C23 1.531(8) yes . .
C21 C23 1.530(5) yes . .
C22 C23 1.527(7) yes . .
C23 C24 1.517(7) yes . .
C24 C25 1.390(7) yes . .
C25 C26 1.373(7) yes . .
C26 C27 1.508(7) yes . .
C27 C28 1.526(7) yes . .
C27 C29 1.532(7) yes . .
C30 C33 1.532(6) yes . .
C31 C33 1.538(7) yes . .
C32 C33 1.539(7) yes . .
C33 C34 1.519(5) yes . .
C34 C35 1.405(6) yes . .
C35 C36 1.377(5) yes . .
C36 C37 1.513(6) yes . .
C37 C38 1.535(7) yes . .
C37 C39 1.527(6) yes . .
C10 H1 0.950 no . .
C10 H2 0.950 no . .
C10 H3 0.950 no . .
C11 H4 0.950 no . .
C11 H5 0.950 no . .
C11 H6 0.950 no . .
C12 H7 0.950 no . .
C12 H8 0.950 no . .
C12 H9 0.950 no . .
C15 H10 0.950 no . .
C17 H11 0.950 no . .
C18 H12 0.950 no . .
C18 H13 0.950 no . .
C18 H14 0.950 no . .
C19 H15 0.950 no . .
C19 H16 0.950 no . .
C19 H17 0.950 no . .
C20 H18 0.950 no . .
C20 H19 0.950 no . .
C20 H20 0.950 no . .
C21 H21 0.950 no . .
C21 H22 0.950 no . .
C21 H23 0.950 no . .
C22 H24 0.950 no . .
C22 H25 0.950 no . .
C22 H26 0.950 no . .
C25 H27 0.950 no . .
C27 H28 0.950 no . .
C28 H29 0.950 no . .
C28 H30 0.950 no . .
C28 H31 0.950 no . .
C29 H32 0.950 no . .
C29 H33 0.950 no . .
C29 H34 0.950 no . .
C30 H35 0.950 no . .
C30 H36 0.950 no . .
C30 H37 0.950 no . .
C31 H38 0.950 no . .
C31 H39 0.950 no . .
C31 H40 0.950 no . .
C32 H41 0.950 no . .
C32 H42 0.950 no . .
C32 H43 0.950 no . .
C35 H44 0.950 no . .
C37 H45 0.950 no . .
C38 H46 0.950 no . .
C38 H47 0.950 no . .
C38 H48 0.950 no . .
C39 H49 0.950 no . .
C39 H50 0.950 no . .
C39 H51 0.950 no . .
C51 H53 0.950 no . .
C51 H54 0.950 no . .
B1 H52 0.950 no . .

loop_
_geom_angle_atom_site_label_1
_geom_angle_atom_site_label_2
_geom_angle_atom_site_label_3
_geom_angle
_geom_angle_publ_flag
_geom_angle_site_symmetry_1
_geom_angle_site_symmetry_2
_geom_angle_site_symmetry_3
N11 Cu1 N21 91.85(12) yes . . .
N11 Cu1 N31 92.28(13) yes . . .
N11 Cu1 N41 123.66(17) yes . . .
N21 Cu1 N31 95.61(14) yes . . .
N21 Cu1 N41 122.81(18) yes . . .
N31 Cu1 N41 122.32(17) yes . . .
Cu1 N11 N12 111.7(2) yes . . .
Cu1 N11 C14 141.8(3) yes . . .
N12 N11 C14 106.3(2) yes . . .
N11 N12 C16 110.2(3) yes . . .
N11 N12 B1 120.4(2) yes . . .
C16 N12 B1 129.3(3) yes . . .
Cu1 N21 N22 111.7(2) yes . . .
Cu1 N21 C24 141.7(3) yes . . .
N22 N21 C24 106.5(3) yes . . .
N21 N22 C26 109.4(3) yes . . .
N21 N22 B1 119.8(3) yes . . .
C26 N22 B1 130.6(3) yes . . .
Cu1 N31 N32 111.9(2) yes . . .
Cu1 N31 C34 140.8(3) yes . . .
N32 N31 C34 107.3(3) yes . . .
N31 N32 C36 109.2(2) yes . . .
N31 N32 B1 120.1(3) yes . . .
C36 N32 B1 130.5(3) yes . . .
Cu1 N41 O41 171.9(5) yes . . .
C10 C13 C11 110.7(3) yes . . .
C10 C13 C12 108.0(4) yes . . .
C10 C13 C14 111.2(3) yes . . .
C11 C13 C12 108.4(3) yes . . .
C11 C13 C14 109.2(3) yes . . .
C12 C13 C14 109.4(3) yes . . .
N11 C14 C13 121.0(3) yes . . .
N11 C14 C15 110.1(4) yes . . .
C13 C14 C15 128.8(3) yes . . .
C14 C15 C16 106.9(3) yes . . .
N12 C16 C15 106.4(3) yes . . .
N12 C16 C17 123.4(3) yes . . .
C15 C16 C17 130.2(3) yes . . .
C16 C17 C18 112.1(3) yes . . .
C16 C17 C19 109.8(3) yes . . .
C18 C17 C19 110.3(3) yes . . .
C20 C23 C21 108.9(4) yes . . .
C20 C23 C22 108.6(4) yes . . .
C20 C23 C24 110.2(3) yes . . .
C21 C23 C22 108.2(3) yes . . .
C21 C23 C24 110.7(4) yes . . .
C22 C23 C24 110.2(4) yes . . .
N21 C24 C23 122.2(4) yes . . .
N21 C24 C25 109.8(4) yes . . .
C23 C24 C25 128.0(4) yes . . .
C24 C25 C26 106.6(4) yes . . .
N22 C26 C25 107.6(4) yes . . .
N22 C26 C27 123.8(4) yes . . .
C25 C26 C27 128.5(4) yes . . .
C26 C27 C28 111.1(4) yes . . .
C26 C27 C29 110.1(3) yes . . .
C28 C27 C29 109.8(4) yes . . .
C30 C33 C31 110.1(4) yes . . .
C30 C33 C32 109.4(3) yes . . .
C30 C33 C34 110.2(3) yes . . .
C31 C33 C32 108.2(4) yes . . .
C31 C33 C34 109.2(3) yes . . .
C32 C33 C34 109.7(4) yes . . .
N31 C34 C33 123.2(4) yes . . .
N31 C34 C35 109.7(3) yes . . .
C33 C34 C35 127.0(3) yes . . .
C34 C35 C36 105.8(3) yes . . .
N32 C36 C35 108.0(3) yes . . .
N32 C36 C37 123.7(3) yes . . .
C35 C36 C37 128.3(4) yes . . .
C36 C37 C38 110.2(3) yes . . .
C36 C37 C39 111.6(3) yes . . .
C38 C37 C39 110.2(4) yes . . .
Cl51 C51 Cl52 108.5(4) yes . . .
N12 B1 N22 108.9(3) yes . . .
N12 B1 N32 109.8(3) yes . . .
N22 B1 N32 110.9(2) yes . . .
C13 C10 H1 110.2 no . . .
C13 C10 H2 107.9 no . . .
C13 C10 H3 110.4 no . . .
H1 C10 H2 109.5 no . . .
H1 C10 H3 109.5 no . . .
H2 C10 H3 109.5 no . . .
C13 C11 H4 110.2 no . . .
C13 C11 H5 108.5 no . . .
C13 C11 H6 109.8 no . . .
H4 C11 H5 109.5 no . . .
H4 C11 H6 109.5 no . . .
H5 C11 H6 109.5 no . . .
C13 C12 H7 110.8 no . . .
C13 C12 H8 108.7 no . . .
C13 C12 H9 108.9 no . . .
H7 C12 H8 109.5 no . . .
H7 C12 H9 109.5 no . . .
H8 C12 H9 109.5 no . . .
C14 C15 H10 126.5 no . . .
C16 C15 H10 126.6 no . . .
C16 C17 H11 107.9 no . . .
C18 C17 H11 108.6 no . . .
C19 C17 H11 108.0 no . . .
C17 C18 H12 110.0 no . . .
C17 C18 H13 109.5 no . . .
C17 C18 H14 109.0 no . . .
H12 C18 H13 109.5 no . . .
H12 C18 H14 109.5 no . . .
H13 C18 H14 109.5 no . . .
C17 C19 H15 109.9 no . . .
C17 C19 H16 109.1 no . . .
C17 C19 H17 109.4 no . . .
H15 C19 H16 109.5 no . . .
H15 C19 H17 109.5 no . . .
H16 C19 H17 109.5 no . . .
C23 C20 H18 109.5 no . . .
C23 C20 H19 110.0 no . . .
C23 C20 H20 108.9 no . . .
H18 C20 H19 109.5 no . . .
H18 C20 H20 109.5 no . . .
H19 C20 H20 109.5 no . . .
C23 C21 H21 108.8 no . . .
C23 C21 H22 110.2 no . . .
C23 C21 H23 109.5 no . . .
H21 C21 H22 109.5 no . . .
H21 C21 H23 109.5 no . . .
H22 C21 H23 109.5 no . . .
C23 C22 H24 109.6 no . . .
C23 C22 H25 109.1 no . . .
C23 C22 H26 109.7 no . . .
H24 C22 H25 109.5 no . . .
H24 C22 H26 109.5 no . . .
H25 C22 H26 109.5 no . . .
C24 C25 H27 126.8 no . . .
C26 C25 H27 126.6 no . . .
C26 C27 H28 108.3 no . . .
C28 C27 H28 109.1 no . . .
C29 C27 H28 108.4 no . . .
C27 C28 H29 109.4 no . . .
C27 C28 H30 110.5 no . . .
C27 C28 H31 108.5 no . . .
H29 C28 H30 109.5 no . . .
H29 C28 H31 109.5 no . . .
H30 C28 H31 109.5 no . . .
C27 C29 H32 108.1 no . . .
C27 C29 H33 110.2 no . . .
C27 C29 H34 110.1 no . . .
H32 C29 H33 109.5 no . . .
H32 C29 H34 109.5 no . . .
H33 C29 H34 109.5 no . . .
C33 C30 H35 109.8 no . . .
C33 C30 H36 110.1 no . . .
C33 C30 H37 108.5 no . . .
H35 C30 H36 109.5 no . . .
H35 C30 H37 109.5 no . . .
H36 C30 H37 109.5 no . . .
C33 C31 H38 109.1 no . . .
C33 C31 H39 109.0 no . . .
C33 C31 H40 110.2 no . . .
H38 C31 H39 109.5 no . . .
H38 C31 H40 109.5 no . . .
H39 C31 H40 109.5 no . . .
C33 C32 H41 110.7 no . . .
C33 C32 H42 109.0 no . . .
C33 C32 H43 108.7 no . . .
H41 C32 H42 109.5 no . . .
H41 C32 H43 109.5 no . . .
H42 C32 H43 109.5 no . . .
C34 C35 H44 127.2 no . . .
C36 C35 H44 127.0 no . . .
C36 C37 H45 108.1 no . . .
C38 C37 H45 108.7 no . . .
C39 C37 H45 107.9 no . . .
C37 C38 H46 109.5 no . . .
C37 C38 H47 109.3 no . . .
C37 C38 H48 109.7 no . . .
H46 C38 H47 109.5 no . . .
H46 C38 H48 109.5 no . . .
H47 C38 H48 109.5 no . . .
C37 C39 H49 109.9 no . . .
C37 C39 H50 109.8 no . . .
C37 C39 H51 108.7 no . . .
H49 C39 H50 109.5 no . . .
H49 C39 H51 109.5 no . . .
H50 C39 H51 109.5 no . . .
Cl51 C51 H53 109.3 no . . .
Cl51 C51 H54 110.0 no . . .
Cl52 C51 H53 109.5 no . . .
Cl52 C51 H54 110.0 no . . .
H53 C51 H54 109.5 no . . .
N12 B1 H52 109.1 no . . .
N22 B1 H52 109.0 no . . .
N32 B1 H52 109.1 no . . .

loop_
_geom_torsion_atom_site_label_1
_geom_torsion_atom_site_label_2
_geom_torsion_atom_site_label_3
_geom_torsion_atom_site_label_4
_geom_torsion
_geom_torsion_publ_flag
_geom_torsion_site_symmetry_1
_geom_torsion_site_symmetry_2
_geom_torsion_site_symmetry_3
_geom_torsion_site_symmetry_4
N11 Cu1 N21 N22 50.3(2) ? . . . .
N11 Cu1 N21 C24 -128.6(4) ? . . . .
N21 Cu1 N11 N12 -47.4(2) ? . . . .
N21 Cu1 N11 C14 128.8(4) ? . . . .
N11 Cu1 N31 N32 -49.5(2) ? . . . .
N11 Cu1 N31 C34 131.1(4) ? . . . .
N31 Cu1 N11 N12 48.3(2) ? . . . .
N31 Cu1 N11 C14 -135.5(4) ? . . . .
N11 Cu1 N41 O41 -17(3) ? . . . .
N41 Cu1 N11 N12 -179.7(2) ? . . . .
N41 Cu1 N11 C14 -3.5(5) ? . . . .
N21 Cu1 N31 N32 42.5(2) ? . . . .
N21 Cu1 N31 C34 -136.8(4) ? . . . .
N31 Cu1 N21 N22 -42.2(2) ? . . . .
N31 Cu1 N21 C24 138.9(4) ? . . . .
N21 Cu1 N41 O41 -135(3) ? . . . .
N41 Cu1 N21 N22 -176.8(2) ? . . . .
N41 Cu1 N21 C24 4.3(4) ? . . . .
N31 Cu1 N41 O41 102(3) ? . . . .
N41 Cu1 N31 N32 177.5(2) ? . . . .
N41 Cu1 N31 C34 -1.8(4) ? . . . .
Cu1 N11 N12 C16 177.1(2) ? . . . .
Cu1 N11 N12 B1 -1.1(4) ? . . . .
Cu1 N11 C14 C13 4.8(6) ? . . . .
Cu1 N11 C14 C15 -175.7(3) ? . . . .
N12 N11 C14 C13 -178.9(3) ? . . . .
N12 N11 C14 C15 0.7(4) ? . . . .
C14 N11 N12 C16 -0.4(4) ? . . . .
C14 N11 N12 B1 -178.7(3) ? . . . .
N11 N12 C16 C15 0.1(3) ? . . . .
N11 N12 C16 C17 177.6(3) ? . . . .
N11 N12 B1 N22 62.2(4) ? . . . .
N11 N12 B1 N32 -59.4(4) ? . . . .
C16 N12 B1 N22 -115.7(4) ? . . . .
C16 N12 B1 N32 122.7(4) ? . . . .
B1 N12 C16 C15 178.1(3) ? . . . .
B1 N12 C16 C17 -4.3(6) ? . . . .
Cu1 N21 N22 C26 -179.5(2) ? . . . .
Cu1 N21 N22 B1 -3.7(3) ? . . . .
Cu1 N21 C24 C23 -1.0(6) ? . . . .
Cu1 N21 C24 C25 179.1(3) ? . . . .
N22 N21 C24 C23 -179.9(2) ? . . . .
N22 N21 C24 C25 0.2(3) ? . . . .
C24 N21 N22 C26 -0.2(3) ? . . . .
C24 N21 N22 B1 175.5(3) ? . . . .
N21 N22 C26 C25 0.1(3) ? . . . .
N21 N22 C26 C27 -179.7(3) ? . . . .
N21 N22 B1 N12 -58.3(3) ? . . . .
N21 N22 B1 N32 62.6(4) ? . . . .
C26 N22 B1 N12 116.4(4) ? . . . .
C26 N22 B1 N32 -122.7(4) ? . . . .
B1 N22 C26 C25 -175.0(3) ? . . . .
B1 N22 C26 C27 5.2(6) ? . . . .
Cu1 N31 N32 C36 -179.8(2) ? . . . .
Cu1 N31 N32 B1 3.0(3) ? . . . .
Cu1 N31 C34 C33 -2.6(6) ? . . . .
Cu1 N31 C34 C35 179.0(3) ? . . . .
N32 N31 C34 C33 178.0(3) ? . . . .
N32 N31 C34 C35 -0.3(4) ? . . . .
C34 N31 N32 C36 -0.2(3) ? . . . .
C34 N31 N32 B1 -177.4(3) ? . . . .
N31 N32 C36 C35 0.7(4) ? . . . .
N31 N32 C36 C37 178.3(3) ? . . . .
N31 N32 B1 N12 57.9(4) ? . . . .
N31 N32 B1 N22 -62.5(4) ? . . . .
C36 N32 B1 N12 -118.5(4) ? . . . .
C36 N32 B1 N22 121.0(4) ? . . . .
B1 N32 C36 C35 177.5(3) ? . . . .
B1 N32 C36 C37 -4.9(5) ? . . . .
C10 C13 C14 N11 -61.7(4) ? . . . .
C10 C13 C14 C15 118.9(4) ? . . . .
C11 C13 C14 N11 60.7(5) ? . . . .
C11 C13 C14 C15 -118.7(4) ? . . . .
C12 C13 C14 N11 179.2(3) ? . . . .
C12 C13 C14 C15 -0.2(5) ? . . . .
N11 C14 C15 C16 -0.6(4) ? . . . .
C13 C14 C15 C16 178.8(4) ? . . . .
C14 C15 C16 N12 0.3(4) ? . . . .
C14 C15 C16 C17 -177.0(4) ? . . . .
N12 C16 C17 C18 156.8(3) ? . . . .
N12 C16 C17 C19 -80.2(4) ? . . . .
C15 C16 C17 C18 -26.2(6) ? . . . .
C15 C16 C17 C19 96.7(5) ? . . . .
C20 C23 C24 N21 57.2(5) ? . . . .
C20 C23 C24 C25 -122.9(4) ? . . . .
C21 C23 C24 N21 -63.3(5) ? . . . .
C21 C23 C24 C25 116.5(4) ? . . . .
C22 C23 C24 N21 177.0(4) ? . . . .
C22 C23 C24 C25 -3.1(6) ? . . . .
N21 C24 C25 C26 -0.2(4) ? . . . .
C23 C24 C25 C26 179.9(3) ? . . . .
C24 C25 C26 N22 0.1(3) ? . . . .
C24 C25 C26 C27 179.8(3) ? . . . .
N22 C26 C27 C28 -106.1(5) ? . . . .
N22 C26 C27 C29 132.1(4) ? . . . .
C25 C26 C27 C28 74.2(6) ? . . . .
C25 C26 C27 C29 -47.7(6) ? . . . .
C30 C33 C34 N31 62.6(5) ? . . . .
C30 C33 C34 C35 -119.4(4) ? . . . .
C31 C33 C34 N31 -58.5(5) ? . . . .
C31 C33 C34 C35 119.5(4) ? . . . .
C32 C33 C34 N31 -176.9(3) ? . . . .
C32 C33 C34 C35 1.1(5) ? . . . .
N31 C34 C35 C36 0.7(4) ? . . . .
C33 C34 C35 C36 -177.5(3) ? . . . .
C34 C35 C36 N32 -0.8(4) ? . . . .
C34 C35 C36 C37 -178.3(3) ? . . . .
N32 C36 C37 C38 158.6(3) ? . . . .
N32 C36 C37 C39 -78.6(4) ? . . . .
C35 C36 C37 C38 -24.3(5) ? . . . .
C35 C36 C37 C39 98.5(4) ? . . . .


#==============================================================================

#     End of CIF

#==============================================================================


#==============================================================================

data_CuNOL3'ClO4_2

#==============================================================================

# CHEMICAL DATA

_chemical_formula_sum                  'C35 H56 Cl13 Cu N7 O5 '
_chemical_formula_moiety               'C35 H56 Cl13 Cu N7 O5 '
_chemical_formula_weight               1179.31
_chemical_melting_point                ?

#==============================================================================

# CRYSTAL DATA
_symmetry_cell_setting                 orthorhombic
_symmetry_space_group_name_H-M        'P n m a'
_symmetry_space_group_name_Hall       '-P 2ac 2n'
_symmetry_Int_Tables_number            62
loop_
_symmetry_equiv_pos_site_id
_symmetry_equiv_pos_as_xyz
1   '+X,+Y,+Z'
2   '1/2-X,1/2+Y,1/2+Z'
3   '+X,1/2-Y,+Z'
4   '1/2-X,-Y,1/2+Z'
5   '-X,-Y,-Z'
6   '1/2+X,1/2-Y,1/2-Z'
7   '-X,1/2+Y,-Z'
8   '1/2+X,+Y,1/2-Z'

#------------------------------------------------------------------------------

_cell_length_a                         33.4238(17)
_cell_length_b                         15.7109(5)
_cell_length_c                         10.2231(4)
_cell_angle_alpha                      90.0000
_cell_angle_beta                       90.0000
_cell_angle_gamma                      90.0000
_cell_volume                           5368.3(4)
_cell_formula_units_Z                  4
_cell_measurement_reflns_used          453
_cell_measurement_theta_min            3.0
_cell_measurement_theta_max            27.5
_cell_measurement_temperature          183.1

#------------------------------------------------------------------------------

_exptl_crystal_description            'block'
_exptl_crystal_colour                 'orange'
_exptl_crystal_size_max                0.35
_exptl_crystal_size_mid                0.30
_exptl_crystal_size_min                0.15
_exptl_crystal_density_diffrn          1.459
_exptl_crystal_density_meas            ?
_exptl_crystal_density_method         'not measured'
_exptl_crystal_F_000                   2420.00
_exptl_absorpt_coefficient_mu          1.097
_exptl_absorpt_correction_type         multi-scan
_exptl_absorpt_process_details         
'Jacobson, R. (1998) Private communication'
_exptl_absorpt_correction_T_min        0.679
_exptl_absorpt_correction_T_max        0.848

#==============================================================================

# EXPERIMENTAL DATA

_diffrn_radiation_type                'Mo K\a'
_diffrn_radiation_wavelength           0.71070
_diffrn_measurement_device_type       'Rigaku Mercury'
_diffrn_measurement_method             \w
_diffrn_detector_area_resol_mean       7.32
_diffrn_reflns_number                  34946
_diffrn_reflns_av_R_equivalents        0.032
_diffrn_reflns_theta_max               27.48
_diffrn_measured_fraction_theta_max    0.993
_diffrn_reflns_theta_full              27.48
_diffrn_measured_fraction_theta_full   0.993
_diffrn_reflns_limit_h_min             -43
_diffrn_reflns_limit_h_max             35
_diffrn_reflns_limit_k_min             -17
_diffrn_reflns_limit_k_max             20
_diffrn_reflns_limit_l_min             -9
_diffrn_reflns_limit_l_max             13

#==============================================================================

# REFINEMENT DATA

_refine_special_details
;
    Refinement was performed using reflections with F^2^ > 3.0 sigma(F^2^).
    The weighted R-factor(wR), goodness of fit (S) and R-factor (gt) are 
    based on F, with F set to zero for negative F. The threshold expression of
    F^2^ > 2.0 sigma(F^2^) is used only for calculating R-factor (gt).
;
_reflns_number_total                   6338
_reflns_number_gt                      4514
_reflns_threshold_expression           F^2^>2.0\s(F^2^)
_refine_ls_structure_factor_coef       F
_refine_ls_R_factor_gt                 0.0677
_refine_ls_wR_factor_ref               0.0948
_refine_ls_hydrogen_treatment          refall
_refine_ls_number_reflns               4514
_refine_ls_number_parameters           342
_refine_ls_goodness_of_fit_ref         1.462
_refine_ls_weighting_scheme            calc
_refine_ls_weighting_details
'w = 1/[0.0010Fo^2^ + 3.0000\s(Fo^2^) + 0.5000]'
_refine_ls_shift/su_max                0.0000
_refine_diff_density_max               1.06
_refine_diff_density_min               -0.87
_refine_ls_extinction_method           none
_refine_ls_extinction_coef             ?

loop_
_atom_type_symbol
_atom_type_description
_atom_type_scat_dispersion_real
_atom_type_scat_dispersion_imag
_atom_type_scat_source
  'C' 'C'  0.003 0.002 
;
International Tables for Crystallography
(1992, Vol. C, Tables 4.2.6.8 and 6.1.1.4)
;
  'H' 'H'  0.000 0.000 
;
International Tables for Crystallography
(1992, Vol. C, Table 6.1.1.4)
;
  'Cl' 'Cl'  0.148 0.159 
;
International Tables for Crystallography
(1992, Vol. C, Tables 4.2.6.8 and 6.1.1.4)
;
  'Cu' 'Cu'  0.320 1.265 
;
International Tables for Crystallography
(1992, Vol. C, Tables 4.2.6.8 and 6.1.1.4)
;
  'N' 'N'  0.006 0.003 
;
International Tables for Crystallography
(1992, Vol. C, Tables 4.2.6.8 and 6.1.1.4)
;
  'O' 'O'  0.011 0.006 
;
International Tables for Crystallography
(1992, Vol. C, Tables 4.2.6.8 and 6.1.1.4)
;

#==============================================================================

# ATOMIC COORDINATES AND THERMAL PARAMETERS

loop_
_atom_site_label
_atom_site_type_symbol
_atom_site_fract_x
_atom_site_fract_y
_atom_site_fract_z
_atom_site_U_iso_or_equiv
_atom_site_adp_type
_atom_site_occupancy
_atom_site_symmetry_multiplicity
_atom_site_calc_flag
_atom_site_refinement_flags
_atom_site_disorder_assembly
_atom_site_disorder_group
 Cu1 Cu 0.18696(2) 0.2500 0.91640(8) 0.0329(2) Uani 1.00 2 d S . .
 Cl51 Cl 0.44832(4) 0.2500 0.68150(19) 0.0456(4) Uani 1.00 2 d S . .
 Cl61 Cl 0.33849(5) 0.08341(11) 0.7485(2) 0.0786(5) Uani 1.00 1 d . . .
 Cl62 Cl 0.37721(5) -0.03623(9) 0.57842(15) 0.0681(4) Uani 1.00 1 d . . .
 Cl63 Cl 0.40813(7) -0.00786(16) 0.8342(2) 0.1092(8) Uani 1.00 1 d . . .
 Cl64 Cl 0.35677(7) 0.2500 1.0537(2) 0.0895(9) Uani 1.00 2 d S . .
 Cl65 Cl 0.43030(7) 0.16058(12) 1.0928(2) 0.1109(8) Uani 1.00 1 d . . .
 Cl66 Cl 0.29926(9) 0.2500 0.4563(4) 0.1235(13) Uani 1.00 2 d S . .
 Cl67 Cl 0.37137(7) 0.15884(11) 0.40289(19) 0.0887(6) Uani 1.00 1 d . . .
 O41 O 0.2707(2) 0.2500 0.9496(15) 0.209(6) Uani 1.00 2 d S . .
 O51 O 0.40690(13) 0.2500 0.7191(5) 0.0532(15) Uani 1.00 2 d S . .
 O52 O 0.47205(19) 0.2500 0.7935(8) 0.130(3) Uani 1.00 2 d S . .
 O53 O 0.45708(16) 0.1775(4) 0.6094(7) 0.133(2) Uani 1.00 1 d . . .
 N11 N 0.15544(8) 0.1575(2) 0.8155(3) 0.0256(8) Uani 1.00 1 d . . .
 N12 N 0.11498(8) 0.1737(2) 0.8124(3) 0.0250(8) Uani 1.00 1 d . . .
 N21 N 0.14463(13) 0.2500 1.0626(4) 0.0264(12) Uani 1.00 2 d S . .
 N22 N 0.10605(12) 0.2500 1.0144(4) 0.0239(11) Uani 1.00 2 d S . .
 N41 N 0.23984(16) 0.2500 0.9414(7) 0.0516(18) Uani 1.00 2 d S . .
 C1 C 0.09951(14) 0.250000(10) 0.8744(5) 0.0212(12) Uani 1.00 2 d S . .
 C10 C 0.22839(12) 0.1077(3) 0.6575(5) 0.0458(13) Uani 1.00 1 d . . .
 C11 C 0.21903(13) 0.0228(3) 0.8635(4) 0.0439(13) Uani 1.00 1 d . . .
 C12 C 0.19672(14) -0.0363(3) 0.6474(5) 0.0458(13) Uani 1.00 1 d . . .
 C13 C 0.20131(11) 0.0454(2) 0.7298(4) 0.0321(10) Uani 1.00 1 d . . .
 C14 C 0.16009(11) 0.0849(2) 0.7489(3) 0.0256(9) Uani 1.00 1 d . . .
 C15 C 0.12275(11) 0.0553(2) 0.7042(4) 0.0316(10) Uani 1.00 1 d . . .
 C16 C 0.09457(11) 0.1128(2) 0.7458(4) 0.0278(9) Uani 1.00 1 d . . .
 C17 C 0.04992(12) 0.1130(3) 0.7269(6) 0.0573(15) Uani 1.00 1 d . . .
 C18 C 0.0404(2) 0.1138(17) 0.5936(11) 0.389(10) Uani 1.00 1 d . . .
 C19 C 0.0325(2) 0.0431(6) 0.791(3) 0.369(10) Uani 1.00 1 d . . .
 C21 C 0.20175(14) 0.1701(3) 1.2589(5) 0.0470(14) Uani 1.00 1 d . . .
 C22 C 0.1620(2) 0.250000(10) 1.4267(6) 0.049(2) Uani 1.00 2 d S . .
 C23 C 0.17675(18) 0.2500 1.2831(6) 0.0341(16) Uani 1.00 2 d S . .
 C24 C 0.14053(17) 0.2500 1.1926(5) 0.0277(14) Uani 1.00 2 d S . .
 C25 C 0.10009(18) 0.250000(10) 1.2267(6) 0.0340(16) Uani 1.00 2 d S . .
 C26 C 0.07827(16) 0.2500 1.1123(5) 0.0284(14) Uani 1.00 2 d S . .
 C27 C 0.03351(17) 0.250000(10) 1.0920(6) 0.0367(16) Uani 1.00 2 d S . .
 C28 C 0.0156(2) 0.1715(7) 1.1522(13) 0.168(4) Uani 1.00 1 d . . .
 C61 C 0.38447(14) 0.0394(3) 0.7010(5) 0.0454(13) Uani 1.00 1 d . . .
 C62 C 0.4085(2) 0.250000(10) 1.0276(8) 0.054(2) Uani 1.00 2 d S . .
 C63 C 0.3503(2) 0.250000(10) 0.4722(8) 0.056(2) Uani 1.00 2 d S . .
 H1 H 0.0714 0.2500 0.8611 0.025 Uiso 1.00 2 c R . .
 H2 H 0.2208 0.1643 0.6787 0.055 Uiso 1.00 1 c R . .
 H3 H 0.2260 0.0992 0.5659 0.055 Uiso 1.00 1 c R . .
 H4 H 0.2554 0.0985 0.6834 0.055 Uiso 1.00 1 c R . .
 H5 H 0.2360 -0.0254 0.8551 0.053 Uiso 1.00 1 c R . .
 H6 H 0.1981 0.0103 0.9234 0.053 Uiso 1.00 1 c R . .
 H7 H 0.2341 0.0698 0.8950 0.053 Uiso 1.00 1 c R . .
 H8 H 0.1746 -0.0311 0.5897 0.055 Uiso 1.00 1 c R . .
 H9 H 0.1926 -0.0833 0.7043 0.055 Uiso 1.00 1 c R . .
 H10 H 0.2205 -0.0450 0.5981 0.055 Uiso 1.00 1 c R . .
 H11 H 0.1181 0.0052 0.6543 0.038 Uiso 1.00 1 c R . .
 H12 H 0.0389 0.1639 0.7618 0.069 Uiso 1.00 1 c R . .
 H13 H 0.0386 0.1687 0.5550 0.467 Uiso 1.00 1 c R . .
 H14 H 0.0154 0.0856 0.5862 0.467 Uiso 1.00 1 c R . .
 H15 H 0.0604 0.0816 0.5497 0.467 Uiso 1.00 1 c R . .
 H16 H 0.0314 -0.0032 0.7311 0.443 Uiso 1.00 1 c R . .
 H17 H 0.0063 0.0566 0.8197 0.443 Uiso 1.00 1 c R . .
 H18 H 0.0485 0.0277 0.8639 0.443 Uiso 1.00 1 c R . .
 H19 H 0.2290 0.1819 1.2784 0.057 Uiso 1.00 1 c R . .
 H20 H 0.1994 0.1535 1.1698 0.057 Uiso 1.00 1 c R . .
 H21 H 0.1925 0.1253 1.3135 0.057 Uiso 1.00 1 c R . .
 H22 H 0.1368 0.2217 1.4316 0.058 Uiso 0.50 1 c R . .
 H23 H 0.1589 0.3070 1.4562 0.058 Uiso 0.50 1 c R . .
 H24 H 0.1808 0.2213 1.4804 0.058 Uiso 0.50 1 c R . .
 H25 H 0.0894 0.2500 1.3128 0.041 Uiso 1.00 2 c R . .
 H26 H 0.0286 0.2500 1.0005 0.044 Uiso 1.00 2 c R . .
 H27 H 0.0154 0.1276 1.0883 0.201 Uiso 1.00 1 c R . .
 H28 H -0.0110 0.1831 1.1794 0.201 Uiso 1.00 1 c R . .
 H29 H 0.0311 0.1539 1.2253 0.201 Uiso 1.00 1 c R . .
 H30 H 0.3565 0.2500 0.5628 0.068 Uiso 1.00 2 c R . .
 H31 H 0.4011 0.0835 0.6680 0.055 Uiso 1.00 1 c R . .
 H32 H 0.4132 0.2500 0.9360 0.065 Uiso 1.00 2 c R . .


loop_
_atom_site_aniso_label
_atom_site_aniso_U_11
_atom_site_aniso_U_22
_atom_site_aniso_U_33
_atom_site_aniso_U_12
_atom_site_aniso_U_13
_atom_site_aniso_U_23
 Cu1 0.0178(3) 0.0362(4) 0.0449(4) 0.0000 -0.0044(3) 0.0000
 Cl51 0.0248(7) 0.0483(9) 0.0637(11) 0.0000 0.0028(7) 0.0000
 Cl61 0.0564(8) 0.0712(10) 0.1083(14) 0.0077(7) 0.0198(8) -0.0065(9)
 Cl62 0.1079(12) 0.0420(7) 0.0544(8) 0.0005(7) -0.0136(8) -0.0082(6)
 Cl63 0.1328(17) 0.1219(18) 0.0730(12) 0.0372(14) -0.0524(12) -0.0077(11)
 Cl64 0.0504(12) 0.132(2) 0.0861(18) 0.0000 -0.0126(11) 0.0000
 Cl65 0.0979(14) 0.0574(10) 0.177(2) 0.0215(9) 0.0191(14) 0.0220(13)
 Cl66 0.0615(15) 0.136(3) 0.173(3) 0.0000 -0.0344(19) 0.0000
 Cl67 0.1312(16) 0.0613(10) 0.0736(11) 0.0225(10) -0.0167(10) -0.0094(8)
 O41 0.024(3) 0.303(17) 0.301(17) 0.0000 -0.038(6) 0.0000
 O51 0.024(2) 0.083(3) 0.053(3) 0.0000 0.000(2) 0.0000
 O52 0.040(3) 0.265(12) 0.084(5) 0.0000 -0.017(3) 0.0000
 O53 0.085(3) 0.101(4) 0.214(7) -0.022(3) 0.065(4) -0.085(4)
 N11 0.0160(13) 0.0264(16) 0.0345(18) 0.0026(11) -0.0008(12) -0.0005(14)
 N12 0.0168(13) 0.0252(16) 0.0331(18) 0.0019(11) 0.0027(12) -0.0028(13)
 N21 0.025(2) 0.021(2) 0.033(2) 0.0000 -0.0077(19) 0.0000
 N22 0.021(2) 0.025(2) 0.026(2) 0.0000 -0.0014(18) 0.0000
 N41 0.024(2) 0.053(3) 0.078(4) 0.0000 -0.008(2) 0.0000
 C1 0.018(2) 0.017(2) 0.029(2) 0.0000 0.0012(19) 0.0000
 C10 0.026(2) 0.059(3) 0.053(3) 0.0122(19) 0.011(2) 0.013(2)
 C11 0.035(2) 0.051(2) 0.046(2) 0.018(2) -0.005(2) 0.004(2)
 C12 0.039(2) 0.043(2) 0.055(3) 0.019(2) 0.004(2) -0.009(2)
 C13 0.0225(18) 0.036(2) 0.038(2) 0.0102(15) 0.0019(16) -0.0002(19)
 C14 0.0244(17) 0.0282(19) 0.0242(19) 0.0056(14) 0.0012(14) 0.0023(16)
 C15 0.0254(18) 0.031(2) 0.039(2) 0.0008(15) 0.0001(16) -0.0079(18)
 C16 0.0198(16) 0.031(2) 0.032(2) -0.0010(14) -0.0002(15) -0.0081(17)
 C17 0.0203(19) 0.061(3) 0.091(4) 0.0049(19) -0.007(2) -0.047(3)
 C18 0.056(4) 0.98(4) 0.135(9) 0.189(13) -0.064(5) -0.265(18)
 C19 0.031(3) 0.074(6) 1.00(5) -0.011(3) 0.069(12) -0.004(16)
 C21 0.043(2) 0.042(2) 0.056(3) 0.006(2) -0.020(2) -0.000(2)
 C22 0.056(4) 0.051(4) 0.039(3) 0.0000 -0.017(3) 0.0000
 C23 0.042(3) 0.029(3) 0.032(3) 0.0000 -0.014(2) 0.0000
 C24 0.037(3) 0.017(2) 0.029(3) 0.0000 -0.004(2) 0.0000
 C25 0.038(3) 0.035(3) 0.029(3) 0.0000 -0.003(2) 0.0000
 C26 0.028(2) 0.026(2) 0.031(3) 0.0000 0.002(2) 0.0000
 C27 0.027(2) 0.051(3) 0.032(3) 0.0000 0.007(2) 0.0000
 C28 0.055(4) 0.189(10) 0.259(13) -0.068(5) -0.057(6) 0.159(10)
 C61 0.042(2) 0.044(2) 0.050(2) -0.000(2) -0.008(2) -0.005(2)
 C62 0.051(4) 0.068(5) 0.044(4) 0.0000 -0.003(3) 0.0000
 C63 0.062(4) 0.053(4) 0.053(4) 0.0000 -0.020(3) 0.0000

#==============================================================================

_computing_data_collection            'CrystalClear'
_computing_cell_refinement            'CrystalClear'
_computing_data_reduction             'CrystalStructure'
_computing_structure_solution         'SIR92'
_computing_structure_refinement       'CRYSTALS'
_computing_publication_material       'CrystalStructure 3.8'
_computing_molecular_graphics          ?

#==============================================================================

# MOLECULAR GEOMETRY

_geom_special_details
;
    ENTER SPECIAL DETAILS OF THE MOLECULAR GEOMETRY
;

loop_
_geom_bond_atom_site_label_1
_geom_bond_atom_site_label_2
_geom_bond_distance
_geom_bond_publ_flag
_geom_bond_site_symmetry_1
_geom_bond_site_symmetry_2
Cu1 N11 2.070(3) yes . .
Cu1 N11 2.070(3) yes . 3_555
Cu1 N21 2.058(4) yes . .
Cu1 N41 1.786(5) yes . .
Cl51 O51 1.437(4) yes . .
Cl51 O52 1.393(7) yes . .
Cl51 O53 1.387(6) yes . .
Cl51 O53 1.387(6) yes . 3_555
Cl61 C61 1.754(5) yes . .
Cl62 C61 1.744(5) yes . .
Cl63 C61 1.741(5) yes . .
Cl64 C62 1.749(7) yes . .
Cl65 C62 1.718(4) yes . .
Cl66 C63 1.712(8) yes . .
Cl67 C63 1.747(5) yes . .
O41 N41 1.035(8) yes . .
N11 N12 1.376(3) yes . .
N11 C14 1.337(4) yes . .
N12 C1 1.451(4) yes . .
N12 C16 1.358(4) yes . .
N21 N22 1.380(6) yes . .
N21 C24 1.337(7) yes . .
N22 C1 1.448(7) yes . .
N22 C26 1.365(7) yes . .
C10 C13 1.523(6) yes . .
C11 C13 1.532(6) yes . .
C12 C13 1.542(6) yes . .
C13 C14 1.524(5) yes . .
C14 C15 1.409(5) yes . .
C15 C16 1.373(5) yes . .
C16 C17 1.505(5) yes . .
C17 C18 1.400(13) yes . .
C17 C19 1.404(18) yes . .
C21 C23 1.529(6) yes . .
C22 C23 1.549(9) yes . .
C23 C24 1.524(8) yes . .
C24 C25 1.396(8) yes . .
C25 C26 1.379(8) yes . .
C26 C27 1.510(7) yes . .
C27 C28 1.502(11) yes . .
C27 C28 1.502(11) yes . 3_555
C1 H1 0.950(6) no . .
C10 H2 0.950(7) no . .
C10 H3 0.950(7) no . .
C10 H4 0.950(5) no . .
C11 H5 0.950(7) no . .
C11 H6 0.950(6) no . .
C11 H7 0.950(7) no . .
C12 H8 0.950(7) no . .
C12 H9 0.950(7) no . .
C12 H10 0.950(6) no . .
C15 H11 0.950(6) no . .
C17 H12 0.950(7) no . .
C18 H13 0.95(3) no . .
C18 H14 0.95(2) no . .
C18 H15 0.95(2) no . .
C19 H16 0.95(3) no . .
C19 H17 0.950(17) no . .
C19 H18 0.95(3) no . .
C21 H19 0.950(6) no . .
C21 H20 0.950(7) no . .
C21 H21 0.950(7) no . .
C22 H22 0.951(9) no . .
C22 H22 0.951(9) no . 3_555
C22 H23 0.950(3) no . .
C22 H23 0.950(3) no . 3_555
C22 H24 0.950(9) no . .
C22 H24 0.950(9) no . 3_555
C25 H25 0.950(8) no . .
C27 H26 0.950(9) no . .
C28 H27 0.950(17) no . .
C28 H28 0.950(11) no . .
C28 H29 0.950(16) no . .
C61 H31 0.950 no . .
C62 H32 0.950 no . .
C63 H30 0.950 no . .

loop_
_geom_angle_atom_site_label_1
_geom_angle_atom_site_label_2
_geom_angle_atom_site_label_3
_geom_angle
_geom_angle_publ_flag
_geom_angle_site_symmetry_1
_geom_angle_site_symmetry_2
_geom_angle_site_symmetry_3
N11 Cu1 N11 89.16(12) yes . . 3_555
N11 Cu1 N21 90.68(12) yes . . .
N11 Cu1 N41 125.09(14) yes . . .
N11 Cu1 N21 90.68(12) yes 3_555 . .
N11 Cu1 N41 125.09(14) yes 3_555 . .
N21 Cu1 N41 125.2(2) yes . . .
O51 Cl51 O52 109.2(3) yes . . .
O51 Cl51 O53 110.2(2) yes . . .
O51 Cl51 O53 110.2(2) yes . . 3_555
O52 Cl51 O53 108.4(3) yes . . .
O52 Cl51 O53 108.4(3) yes . . 3_555
O53 Cl51 O53 110.3(4) yes . . 3_555
Cu1 N11 N12 112.4(2) yes . . .
Cu1 N11 C14 142.5(2) yes . . .
N12 N11 C14 105.1(2) yes . . .
N11 N12 C1 119.5(3) yes . . .
N11 N12 C16 112.0(2) yes . . .
C1 N12 C16 128.5(3) yes . . .
Cu1 N21 N22 112.6(3) yes . . .
Cu1 N21 C24 142.4(3) yes . . .
N22 N21 C24 105.0(4) yes . . .
N21 N22 C1 119.6(4) yes . . .
N21 N22 C26 112.0(4) yes . . .
C1 N22 C26 128.4(4) yes . . .
Cu1 N41 O41 176.4(10) yes . . .
N12 C1 N12 111.3(3) yes . . 3_555
N12 C1 N22 112.2(2) yes . . .
N12 C1 N22 112.2(2) yes 3_555 . .
C10 C13 C11 110.6(3) yes . . .
C10 C13 C12 109.2(3) yes . . .
C10 C13 C14 109.8(3) yes . . .
C11 C13 C12 109.4(3) yes . . .
C11 C13 C14 109.2(3) yes . . .
C12 C13 C14 108.6(3) yes . . .
N11 C14 C13 121.2(3) yes . . .
N11 C14 C15 110.1(3) yes . . .
C13 C14 C15 128.7(3) yes . . .
C14 C15 C16 106.8(3) yes . . .
N12 C16 C15 105.9(3) yes . . .
N12 C16 C17 124.1(3) yes . . .
C15 C16 C17 129.9(4) yes . . .
C16 C17 C18 110.4(5) yes . . .
C16 C17 C19 110.5(6) yes . . .
C18 C17 C19 111.5(15) yes . . .
C21 C23 C21 110.5(4) yes . . 3_555
C21 C23 C22 109.2(3) yes . . .
C21 C23 C24 109.6(3) yes . . .
C21 C23 C22 109.2(3) yes 3_555 . .
C21 C23 C24 109.6(3) yes 3_555 . .
C22 C23 C24 108.8(5) yes . . .
N21 C24 C23 121.5(5) yes . . .
N21 C24 C25 110.3(5) yes . . .
C23 C24 C25 128.2(5) yes . . .
C24 C25 C26 107.5(5) yes . . .
N22 C26 C25 105.2(4) yes . . .
N22 C26 C27 125.0(5) yes . . .
C25 C26 C27 129.8(5) yes . . .
C26 C27 C28 109.8(4) yes . . .
C26 C27 C28 109.8(4) yes . . 3_555
C28 C27 C28 110.3(7) yes . . 3_555
Cl61 C61 Cl62 110.2(2) yes . . .
Cl61 C61 Cl63 110.5(2) yes . . .
Cl62 C61 Cl63 109.6(2) yes . . .
Cl64 C62 Cl65 111.1(3) yes . . .
Cl64 C62 Cl65 111.1(3) yes . . 3_555
Cl65 C62 Cl65 109.8(4) yes . . 3_555
Cl66 C63 Cl67 111.3(3) yes . . .
Cl66 C63 Cl67 111.3(3) yes . . 3_555
Cl67 C63 Cl67 110.2(4) yes . . 3_555
N12 C1 H1 106.9(3) no . . .
N12 C1 H1 106.9(3) no 3_555 . .
N22 C1 H1 106.9(5) no . . .
C13 C10 H2 109.3(4) no . . .
C13 C10 H3 109.7(5) no . . .
C13 C10 H4 109.3(5) no . . .
H2 C10 H3 109.5(6) no . . .
H2 C10 H4 109.5(6) no . . .
H3 C10 H4 109.5(6) no . . .
C13 C11 H5 109.5(5) no . . .
C13 C11 H6 109.8(4) no . . .
C13 C11 H7 109.1(5) no . . .
H5 C11 H6 109.5(6) no . . .
H5 C11 H7 109.5(5) no . . .
H6 C11 H7 109.5(6) no . . .
C13 C12 H8 110.2(5) no . . .
C13 C12 H9 109.1(5) no . . .
C13 C12 H10 109.1(5) no . . .
H8 C12 H9 109.5(6) no . . .
H8 C12 H10 109.5(7) no . . .
H9 C12 H10 109.5(6) no . . .
C14 C15 H11 126.3(4) no . . .
C16 C15 H11 126.8(4) no . . .
C16 C17 H12 109.8(5) no . . .
C18 C17 H12 105.6(11) no . . .
C19 C17 H12 108.9(9) no . . .
C17 C18 H13 115(2) no . . .
C17 C18 H14 105.8(14) no . . .
C17 C18 H15 107.2(14) no . . .
H13 C18 H14 109(2) no . . .
H13 C18 H15 109(2) no . . .
H14 C18 H15 109(3) no . . .
C17 C19 H16 108(2) no . . .
C17 C19 H17 110.6(13) no . . .
C17 C19 H18 109.4(10) no . . .
H16 C19 H17 109.5(18) no . . .
H16 C19 H18 109.5(18) no . . .
H17 C19 H18 109(3) no . . .
C23 C21 H19 109.2(5) no . . .
C23 C21 H20 109.7(5) no . . .
C23 C21 H21 109.5(5) no . . .
H19 C21 H20 109.5(6) no . . .
H19 C21 H21 109.5(6) no . . .
H20 C21 H21 109.5(6) no . . .
C23 C22 H22 109.4(7) no . . .
C23 C22 H22 109.4(7) no . . 3_555
C23 C22 H23 109.5(5) no . . .
C23 C22 H23 109.5(5) no . . 3_555
C23 C22 H24 109.6(7) no . . .
C23 C22 H24 109.6(7) no . . 3_555
H22 C22 H22 55.7(5) no . . 3_555
H22 C22 H23 109.3(8) no . . .
H22 C22 H23 56.6(5) no . . 3_555
H22 C22 H24 109.5(6) no . . .
H22 C22 H24 141.1(10) no . . 3_555
H22 C22 H23 56.6(5) no 3_555 . .
H22 C22 H23 109.3(8) no 3_555 . 3_555
H22 C22 H24 141.1(10) no 3_555 . .
H22 C22 H24 109.5(6) no 3_555 . 3_555
H23 C22 H23 140.9(9) no . . 3_555
H23 C22 H24 109.5(8) no . . .
H23 C22 H24 55.9(5) no . . 3_555
H23 C22 H24 55.9(5) no 3_555 . .
H23 C22 H24 109.5(8) no 3_555 . 3_555
H24 C22 H24 56.7(5) no . . 3_555
C24 C25 H25 126.5(7) no . . .
C26 C25 H25 126.0(6) no . . .
C26 C27 H26 107.7(6) no . . .
C28 C27 H26 109.6(5) no . . .
C28 C27 H26 109.6(5) no 3_555 . .
C27 C28 H27 108.5(12) no . . .
C27 C28 H28 109.6(11) no . . .
C27 C28 H29 110.2(9) no . . .
H27 C28 H28 109.5(12) no . . .
H27 C28 H29 109.5(13) no . . .
H28 C28 H29 109.5(15) no . . .
Cl61 C61 H31 108.9 no . . .
Cl62 C61 H31 108.8 no . . .
Cl63 C61 H31 108.8 no . . .
Cl64 C62 H32 108.4 no . . .
Cl65 C62 H32 108.2 no . . .
Cl65 C62 H32 108.2 no 3_555 . .
Cl66 C63 H30 108.2 no . . .
Cl67 C63 H30 107.8 no . . .
Cl67 C63 H30 107.8 no 3_555 . .

loop_
_geom_torsion_atom_site_label_1
_geom_torsion_atom_site_label_2
_geom_torsion_atom_site_label_3
_geom_torsion_atom_site_label_4
_geom_torsion
_geom_torsion_publ_flag
_geom_torsion_site_symmetry_1
_geom_torsion_site_symmetry_2
_geom_torsion_site_symmetry_3
_geom_torsion_site_symmetry_4
N11 Cu1 N11 N12 46.5(2) ? . . 3_555 3_555
N11 Cu1 N11 C14 -133.1(4) ? . . 3_555 3_555
N11 Cu1 N11 N12 -46.5(2) ? 3_555 . . .
N11 Cu1 N11 C14 133.1(4) ? 3_555 . . .
N11 Cu1 N21 N22 -44.59(8) ? . . . .
N11 Cu1 N21 C24 135.41(8) ? . . . .
N21 Cu1 N11 N12 44.1(2) ? . . . .
N21 Cu1 N11 C14 -136.3(4) ? . . . .
N11 Cu1 N41 O41 59.08(18) ? . . . .
N41 Cu1 N11 N12 179.6(3) ? . . . .
N41 Cu1 N11 C14 -0.8(5) ? . . . .
N11 Cu1 N21 N22 44.59(8) ? 3_555 . . .
N11 Cu1 N21 C24 -135.41(8) ? 3_555 . . .
N21 Cu1 N11 N12 -44.1(2) ? . . 3_555 3_555
N21 Cu1 N11 C14 136.3(4) ? . . 3_555 3_555
N11 Cu1 N41 O41 -59.08(18) ? 3_555 . . .
N41 Cu1 N11 N12 -179.6(3) ? . . 3_555 3_555
N41 Cu1 N11 C14 0.8(5) ? . . 3_555 3_555
Cu1 N11 N12 C1 0.9(4) ? . . . .
Cu1 N11 N12 C16 179.9(2) ? . . . .
Cu1 N11 C14 C13 0.1(5) ? . . . .
Cu1 N11 C14 C15 -179.7(3) ? . . . .
N12 N11 C14 C13 179.8(3) ? . . . .
N12 N11 C14 C15 -0.1(3) ? . . . .
C14 N11 N12 C1 -178.8(3) ? . . . .
C14 N11 N12 C16 0.1(3) ? . . . .
N11 N12 C1 N12 63.1(4) ? . . . 3_555
N11 N12 C1 N22 -63.6(4) ? . . . .
N11 N12 C16 C15 -0.1(3) ? . . . .
N11 N12 C16 C17 179.5(4) ? . . . .
C1 N12 C16 C15 178.7(3) ? . . . .
C1 N12 C16 C17 -1.7(6) ? . . . .
C16 N12 C1 N12 -115.6(4) ? . . . 3_555
C16 N12 C1 N22 117.6(4) ? . . . .
N21 N22 C1 N12 63.1(2) ? . . . .
N21 N22 C1 N12 -63.1(2) ? . . . 3_555
C26 N22 C1 N12 -116.9(2) ? . . . .
C26 N22 C1 N12 116.9(2) ? . . . 3_555
C10 C13 C14 N11 -59.6(5) ? . . . .
C10 C13 C14 C15 120.2(4) ? . . . .
C11 C13 C14 N11 61.8(4) ? . . . .
C11 C13 C14 C15 -118.4(4) ? . . . .
C12 C13 C14 N11 -178.9(3) ? . . . .
C12 C13 C14 C15 0.9(6) ? . . . .
N11 C14 C15 C16 0.1(3) ? . . . .
C13 C14 C15 C16 -179.8(3) ? . . . .
C14 C15 C16 N12 0.0(4) ? . . . .
C14 C15 C16 C17 -179.5(4) ? . . . .
N12 C16 C17 C18 121.0(12) ? . . . .
N12 C16 C17 C19 -115.1(12) ? . . . .
C15 C16 C17 C18 -59.5(13) ? . . . .
C15 C16 C17 C19 64.3(13) ? . . . .
C21 C23 C24 N21 -60.7(3) ? . . . .
C21 C23 C24 C25 119.3(3) ? . . . .
C21 C23 C24 N21 60.7(3) ? 3_555 . . .
C21 C23 C24 C25 -119.3(3) ? 3_555 . . .
N22 C26 C27 C28 119.3(6) ? . . . .
N22 C26 C27 C28 -119.3(6) ? . . . 3_555
C25 C26 C27 C28 -60.7(6) ? . . . .
C25 C26 C27 C28 60.7(6) ? . . . 3_555


#==============================================================================

#     End of CIF

#==============================================================================

# END
#
